# Supplementary material
Source: PubMed Central journal article supplement (PMC9710190)
Supplement: NIHMS1839484-supplement-Supplemental_Material_1.pdf [file NIHMS1839484-supplement-Supplemental_Material_1.pdf]

## Supplemental Materials 1

Table S1

Mean and SDs of Social Role Instability in Union Formation by Data Source, Birth-year Group, Age Group, and Sociodemographic Moderators

|                             | Monitoring the Future (MTF) |           |           |      |         | Panel Study of Income Dynamics (PSID) |           |           |           |           | Health and Retirement Survey (HRS) |          |           |           |           |         |          |
|-----------------------------|-----------------------------|-----------|-----------|------|---------|---------------------------------------|-----------|-----------|-----------|-----------|------------------------------------|----------|-----------|-----------|-----------|---------|----------|
|                             | 1950-69                     | 1970-89   | ≥1990     | Net  | NET SD  | ≤1929                                 | 1930-49   | 1950-69   | 1970-89   | ≥1990     | Net                                | NET SD   | ≤1929     | 1930-49   | 1950-69   | Net     | NET SD   |
|                             |                             |           |           | D    | Δ/%Δ    |                                       |           |           |           |           | D                                  | Δ/%Δ     |           |           |           | D       | Δ/%Δ     |
| <b>Full Sample</b>          |                             |           |           |      |         |                                       |           |           |           |           |                                    |          |           |           |           |         |          |
| Between ages 18-24          | .18 (.27)                   | .17 (.29) | .17 (.30) | -.01 | .03/11% |                                       |           | .08 (.19) | .09 (.23) | .09 (.25) | .05                                | .06/43%  |           |           |           |         |          |
| Between ages 24-30          | .20 (.28)                   | .21 (.29) | .24 (.39) | .15  | .11/39% |                                       |           | .08 (.19) | .13 (.27) | .11 (.35) | .14                                | .16/84%  |           |           |           |         |          |
| Between ages 30-45          | .20 (.29)                   | .19 (.35) |           | -.02 | .06/21% |                                       | .04 (.12) | .07 (.17) | .10 (.23) |           | .31                                | .11/92%  |           |           |           |         |          |
| Between ages 45-60          |                             |           |           |      |         | .02 (.08)                             | .03 (.12) | .04 (.15) |           |           | .18                                | .07/88%  | .04 (.16) | .06 (.19) | .11       | .03/19% |          |
| Between ages 60-75          |                             |           |           |      |         | .02 (.08)                             | .03 (.10) | .04 (.13) |           |           | .17                                | .05/63%  | .03 (.12) | .04 (.17) | .06 (.20) | .20     | .08/67%  |
| Between ages 75+            |                             |           |           |      |         | .02 (.11)                             | .06 (.13) |           |           |           | .35                                | .02/18%  | .05 (.14) | .07 (.16) | .12       | .02/14% |          |
| <b>Men</b>                  |                             |           |           |      |         |                                       |           |           |           |           |                                    |          |           |           |           |         |          |
| Between ages 18-24          | .15 (.26)                   | .15 (.28) | .14 (.27) | -.06 | .01/4%  |                                       |           | .06 (.17) | .07 (.21) | .06 (.22) | .00                                | .05/29%  |           |           |           |         |          |
| Between ages 24-30          | .20 (.28)                   | .21 (.30) | .23 (.38) | .12  | .10/36% |                                       |           | .09 (.20) | .13 (.27) | .11 (.31) | .12                                | .11/55%  |           |           |           |         |          |
| Between ages 30-45          | .18 (.30)                   | .20 (.35) |           | .07  | .05/17% |                                       | .04 (.13) | .07 (.18) | .11 (.24) |           | .32                                | .11/85%  |           |           |           |         |          |
| Between ages 45-60          |                             |           |           |      |         | .02 (.08)                             | .03 (.12) | .04 (.16) |           |           | .19                                | .08/100% | .05 (.17) | .06 (.20) | .04       | .03/18% |          |
| Between ages 60-75          |                             |           |           |      |         | .02 (.09)                             | .02 (.10) | .05 (.13) |           |           | .28                                | .04/44%  | .03 (.15) | .04 (.13) | .04 (.21) | .07     | .06/40%  |
| Between ages 75+            |                             |           |           |      |         | .03 (.13)                             | .03 (.16) |           |           |           | .02                                | .03/23%  | .05 (.15) | .07 (.15) | .07       | .00/0%  |          |
| <b>Women</b>                |                             |           |           |      |         |                                       |           |           |           |           |                                    |          |           |           |           |         |          |
| Between ages 18-24          | .20 (.27)                   | .20 (.30) | .20 (.32) | .01  | .05/19% |                                       |           | .09 (.20) | .10 (.24) | .11 (.28) | .10                                | .08/40%  |           |           |           |         |          |
| Between ages 24-30          | .19 (.27)                   | .20 (.29) | .25 (.40) | .22  | .13/48% |                                       |           | .07 (.19) | .13 (.26) | .13 (.37) | .27                                | .18/95%  |           |           |           |         |          |
| Between ages 30-45          | .18 (.29)                   | .19 (.35) |           | .02  | .06/21% |                                       | .04 (.12) | .06 (.16) | .09 (.23) |           | .27                                | .11/92%  |           |           |           |         |          |
| Between ages 45-60          |                             |           |           |      |         | .02 (.08)                             | .03 (.11) | .04 (.14) |           |           | .17                                | .06/75%  | .03 (.05) | .07 (.06) | .65       | .01/20% |          |
| Between ages 60-75          |                             |           |           |      |         | .02 (.08)                             | .03 (.09) | .03 (.13) |           |           | .07                                | .05/63%  | .07 (.08) | .04 (.12) | .10 (.18) | .24     | .10/125% |
| Between ages 75+            |                             |           |           |      |         | .02 (.07)                             | .07 (.10) |           |           |           | .67                                | .03/43%  | .05 (.14) | .07 (.17) | .14       | .03/21% |          |
| <b>Bachelor's degree</b>    |                             |           |           |      |         |                                       |           |           |           |           |                                    |          |           |           |           |         |          |
| Between ages 18-24          | .11 (.22)                   | .12 (.25) | .13 (.25) | .10  | .03/14% |                                       |           | .06 (.18) | .07 (.22) | .06 (.27) | .01                                | .09/50%  |           |           |           |         |          |
| Between ages 24-30          | .21 (.26)                   | .21 (.28) | .24 (.40) | .11  | .14/54% |                                       |           | .07 (.16) | .12 (.25) | .12 (.38) | .27                                | .22/138% |           |           |           |         |          |
| Between ages 30-45          | .20 (.28)                   | .19 (.35) |           | -.04 | .07/25% |                                       | .04 (.11) | .05 (.12) | .08 (.21) |           | .21                                | .10/91%  |           |           |           |         |          |
| Between ages 45-60          |                             |           |           |      |         | .02 (.07)                             | .03 (.11) | .04 (.13) |           |           | .16                                | .06/86%  | .01 (.15) | .06 (.17) | .30       | .02/13% |          |
| Between ages 60-75          |                             |           |           |      |         | .02 (.06)                             | .02 (.08) | .04 (.10) |           |           | .28                                | .04/67%  | .02 (.11) | .03 (.13) | .04 (.17) | .11     | .06/55%  |
| Between ages 75+            |                             |           |           |      |         | .05 (.09)                             | .11 (.10) |           |           |           | .64                                | .01/11%  | .05 (.14) | .07 (.14) | .14       | .00/0%  |          |
| <b>No Bachelor's degree</b> |                             |           |           |      |         |                                       |           |           |           |           |                                    |          |           |           |           |         |          |
| Between ages 18-24          | .21 (.22)                   | .21 (.25) | .18 (.25) | -.08 | .03/14% |                                       |           | .08 (.19) | .10 (.23) | .09 (.25) | .06                                | .06/32%  |           |           |           |         |          |
| Between ages 24-30          | .19 (.29)                   | .21 (.31) | .25 (.39) | .18  | .10/34% |                                       |           | .09 (.20) | .14 (.27) | .11 (.34) | .11                                | .14/70%  |           |           |           |         |          |
| Between ages 30-45          | .19 (.30)                   | .19 (.35) |           | .00  | .05/17% |                                       | .04 (.13) | .07 (.18) | .12 (.24) |           | .39                                | .11/85%  |           |           |           |         |          |
| Between ages 45-60          |                             |           |           |      |         | .02 (.08)                             | .03 (.12) | .05 (.16) |           |           | .21                                | .08/100% | .05 (.17) | .06 (.20) | .07       | .03/18% |          |
| Between ages 60-75          |                             |           |           |      |         | .02 (.08)                             | .03 (.10) | .04 (.14) |           |           | .17                                | .06/75%  | .04 (.13) | .05 (.17) | .08 (.20) | .25     | .07/54%  |
| Between ages 75+            |                             |           |           |      |         | .02 (.10)                             | .04 (.14) |           |           |           | .15                                | .04/40%  | .05 (.14) | .07 (.17) | .11       | .03/21% |          |

Notes. SDs are in parentheses. Net D, Net Δ SD, and Net %Δ in SD compare youngest available cohort to oldest available cohort.

**Table S2***Mean and SDs of Social Role Instability in Employment by Data Source, Birth-year Group, Age Group, and Sociodemographic Moderators*

|                             | Monitoring the Future (MTF) |           |           |       |             | Panel Study of Income Dynamics (PSID) |           |           |           |           | Health and Retirement Survey (HRS) |             |           |           |           |        |             |
|-----------------------------|-----------------------------|-----------|-----------|-------|-------------|---------------------------------------|-----------|-----------|-----------|-----------|------------------------------------|-------------|-----------|-----------|-----------|--------|-------------|
|                             | 1950-69                     | 1970-89   | ≥1990     | Net D | NET SD Δ/%Δ | ≤1929                                 | 1930-49   | 1950-69   | 1970-89   | ≥1990     | Net D                              | NET SD Δ/%Δ | ≤1929     | 1930-49   | 1950-69   | Net D  | NET SD Δ/%Δ |
| <b>Full Sample</b>          |                             |           |           |       |             |                                       |           |           |           |           |                                    |             |           |           |           |        |             |
| Between ages 18-24          | .24 (.31)                   | .21 (.31) | .16 (.30) | -.24  | -.01/-3%    |                                       |           | .19 (.27) | .31 (.34) | .36 (.39) | .57                                | .12/44%     |           |           |           |        |             |
| Between ages 24-30          | .30 (.33)                   | .32 (.34) | .39 (.46) | .27   | .13/39%     |                                       |           | .22 (.27) | .21 (.33) | .26 (.43) | .15                                | .16/59%     |           |           |           |        |             |
| Between ages 30-45          | .26 (.33)                   | .26 (.39) |           | .00   | .06/18%     |                                       | .16 (.23) | .16 (.24) | .16 (.30) |           | .00                                | .07/30%     |           |           |           |        |             |
| Between ages 45-60          |                             |           |           |       |             | .14 (.24)                             | .15 (.23) | .14 (.23) |           |           | -.03                               | -.01/-4%    | .14 (.28) | .17 (.30) | .11       | .02/7% |             |
| Between ages 60-75          |                             |           |           |       |             | .07 (.14)                             | .14 (.21) | .30 (.30) |           |           | 1.13                               | .16/114%    | .09(.16)  | .11 (.19) | .13 (.33) | .20    | .17/106%    |
| Between ages 75+            |                             |           |           |       |             | .01 (.08)                             | .08 (.20) |           |           |           | .56                                | .12/150%    | .01 (.08) | .03 (.14) |           | .11    | .06/75%     |
| <b>Men</b>                  |                             |           |           |       |             |                                       |           |           |           |           |                                    |             |           |           |           |        |             |
| Between ages 18-24          | .26 (.32)                   | .22 (.32) | .16 (.30) | -.32  | -.02/-6%    |                                       |           | .20 (.28) | .30 (.34) | .36 (.38) | .50                                | .10/36%     |           |           |           |        |             |
| Between ages 24-30          | .27 (.32)                   | .30 (.34) | .39 (.46) | .34   | .14/44%     |                                       |           | .22 (.28) | .20 (.33) | .24 (.42) | .09                                | .14/50%     |           |           |           |        |             |
| Between ages 30-45          | .19 (.31)                   | .21 (.37) |           | .07   | .06/19%     |                                       | .16 (.24) | .14 (.25) | .13 (.28) |           | -.12                               | .04/17%     |           |           |           |        |             |
| Between ages 45-60          |                             |           |           |       |             | .16 (.26)                             | .15 (.23) | .13 (.22) |           |           | -.14                               | -.04/-15%   | .14 (.29) | .20 (.30) | .20       | .01/3% |             |
| Between ages 60-75          |                             |           |           |       |             | .11 (.16)                             | .17 (.21) | .16 (.30) |           |           | .26                                | .14/88%     | .13 (.19) | .13 (.20) | .12 (.34) | -.02   | .15/79%     |
| Between ages 75+            |                             |           |           |       |             | .02 (.10)                             | .02 (.23) |           |           |           | .00                                | .13/130%    | .02 (.11) | .04 (.16) |           | .11    | .05/45%     |
| <b>Women</b>                |                             |           |           |       |             |                                       |           |           |           |           |                                    |             |           |           |           |        |             |
| Between ages 18-24          | .23 (.31)                   | .20 (.31) | .14 (.30) | -.30  | -.01/-3%    |                                       |           | .21 (.26) | .31 (.34) | .36 (.40) | .51                                | .14/54%     |           |           |           |        |             |
| Between ages 24-30          | .31 (.33)                   | .32 (.34) | .37 (.46) | .19   | .13/39%     |                                       |           | .22 (.27) | .22 (.33) | .28 (.44) | .19                                | .17/63%     |           |           |           |        |             |
| Between ages 30-45          | .29 (.34)                   | .30 (.37) |           | .04   | .03/9%      |                                       | .16 (.22) | .19 (.23) | .19 (.30) |           | .13                                | .08/36%     |           |           |           |        |             |
| Between ages 45-60          |                             |           |           |       |             | .13 (.21)                             | .16 (.23) | .15 (.23) |           |           | .07                                | .02/10%     | .14 (.28) | .14 (.30) | .01       | .02/7% |             |
| Between ages 60-75          |                             |           |           |       |             | .05 (.12)                             | .14 (.19) | .16 (.30) |           |           | .59                                | .18/150%    | .05 (.12) | .09 (.17) | .13 (.32) | .36    | .20/167%    |
| Between ages 75+            |                             |           |           |       |             | .01 (.06)                             | .11 (.18) |           |           |           | .96                                | .12/200%    | .01 (.05) | .02 (.11) |           | .14    | .06/120%    |
| <b>Bachelor's degree</b>    |                             |           |           |       |             |                                       |           |           |           |           |                                    |             |           |           |           |        |             |
| Between ages 18-24          | .11 (.26)                   | .13 (.26) | .10 (.26) | -.05  | .00/0%      |                                       |           | .13 (.29) | .32 (.35) | .41 (.38) | .89                                | .09/31%     |           |           |           |        |             |
| Between ages 24-30          | .35 (.31)                   | .35 (.33) | .44 (.46) | .27   | .15/48%     |                                       |           | .22 (.25) | .20 (.30) | .24 (.41) | .09                                | .16/64%     |           |           |           |        |             |
| Between ages 30-45          | .26 (.32)                   | .25 (.39) |           | -.03  | .07/22%     |                                       | .14 (.19) | .13 (.19) | .12 (.26) |           | -.07                               | .07/37%     |           |           |           |        |             |
| Between ages 45-60          |                             |           |           |       |             | .12 (.23)                             | .15 (.20) | .12 (.20) |           |           | .04                                | -.03/-13%   | .11 (.29) | .19 (.29) | .25       | .00/0% |             |
| Between ages 60-75          |                             |           |           |       |             | .09 (.15)                             | .15 (.21) | .32 (.30) |           |           | .89                                | .15/100%    | .15 (.18) | .13 (.20) | .19 (.34) | .16    | .16/89%     |
| Between ages 75+            |                             |           |           |       |             | .04 (.10)                             | .14 (.21) |           |           |           | .69                                | .11/110%    | .02 (.07) | .03 (.13) |           | .11    | .06/86%     |
| <b>No Bachelor's degree</b> |                             |           |           |       |             |                                       |           |           |           |           |                                    |             |           |           |           |        |             |
| Between ages 18-24          | .29 (.33)                   | .27 (.34) | .19 (.31) | -.34  | -.02/-6%    |                                       |           | .20 (.27) | .30 (.34) | .35 (.39) | .48                                | .12/44%     |           |           |           |        |             |
| Between ages 24-30          | .27 (.34)                   | .29 (.36) | .32 (.46) | .16   | .12/35%     |                                       |           | .22 (.28) | .23 (.34) | .27 (.44) | .18                                | .16/57%     |           |           |           |        |             |
| Between ages 30-45          | .25 (.34)                   | .26 (.39) |           | .02   | .05/15%     |                                       | .16 (.22) | .18 (.25) | .19 (.31) |           | .10                                | .09/41%     |           |           |           |        |             |
| Between ages 45-60          |                             |           |           |       |             | .14 (.22)                             | .16 (.23) | .15 (.24) |           |           | .02                                | .02/9%      | .15 (.28) | .16 (.30) | .06       | .02/7% |             |
| Between ages 60-75          |                             |           |           |       |             | .07 (.14)                             | .13 (.21) | .27 (.30) |           |           | 1.09                               | .16/114%    | .08 (.16) | .10 (.19) | .14 (.33) | .24    | .17/106%    |
| Between ages 75+            |                             |           |           |       |             | .01 (.07)                             | .05 (.20) |           |           |           | .35                                | .13/186%    | .01 (.07) | .03 (.13) |           | .16    | .06/86%     |

Notes. SDs are in parentheses. Net D, Net Δ SD, and Net %Δ in SD compare youngest available cohort to oldest available cohort.

**Table S3**

*Mean and SDs of Social Role Instability in College Attendance by Data Source, Birth-year Group, Age Group, and Sociodemographic Moderators*

|                             | Monitoring the Future (MTF) |           |           |      |         | Panel Study of Income Dynamics (PSID) |           |           |           |           |      |          |
|-----------------------------|-----------------------------|-----------|-----------|------|---------|---------------------------------------|-----------|-----------|-----------|-----------|------|----------|
|                             |                             |           |           | Net  | NET SD  |                                       |           |           |           |           | Net  | NET SD   |
|                             | 1950-69                     | 1970-89   | ≥1990     | D    | Δ/%Δ    | ≤1929                                 | 1930-49   | 1950-69   | 1970-89   | ≥1990     | D    | Δ/%Δ     |
| <b>Full Sample</b>          |                             |           |           |      |         |                                       |           |           |           |           |      |          |
| Between ages 18-24          | .35 (.36)                   | .44 (.37) | .50 (.40) | .41  | .04/11% |                                       |           | .17 (.24) | .23 (.28) | .34 (.37) | .60  | .13/54%  |
| Between ages 24-30          | .12 (.24)                   | .18 (.29) | .18 (.42) | .25  | .18/75% |                                       |           | .04 (.15) | .08 (.22) | .12 (.30) | .48  | .15/100% |
| Between ages 30-45          | .06 (.18)                   | .08 (.25) |           | .08  | .07/39% |                                       | .01 (.07) | .02 (.10) | .03 (.16) |           | .10  | .09/29%  |
| Between ages 45-60          |                             |           |           |      |         | .00 (.02)                             | .01 (.06) | .01 (.08) |           |           | .08  | .06/300% |
| Between ages 60-75          |                             |           |           |      |         | .00 (.03)                             | .00 (.03) | .00 (.03) |           |           | .00  | .00/0%   |
| Between ages 75+            |                             |           |           |      |         | .00 (.01)                             | .00 (.00) |           |           |           | .00  | -.01/0%  |
| <b>Men</b>                  |                             |           |           |      |         |                                       |           |           |           |           |      |          |
| Between ages 18-24          | .35 (.37)                   | .42 (.38) | .50 (.41) | .40  | .04/11% |                                       |           | .18 (.24) | .24 (.28) | .34 (.38) | .57  | .14/58%  |
| Between ages 24-30          | .12 (.24)                   | .16 (.29) | .22 (.41) | .36  | .17/71% |                                       |           | .04 (.14) | .08 (.20) | .12 (.29) | .50  | .15/107% |
| Between ages 30-45          | .05 (.17)                   | .07 (.22) |           | .11  | .05/29% |                                       | .01 (.07) | .01 (.07) | .01 (.15) |           | .05  | .08/114% |
| Between ages 45-60          |                             |           |           |      |         | .00 (.01)                             | .01 (.07) | .00 (.06) |           |           | .08  | .05/500% |
| Between ages 60-75          |                             |           |           |      |         | .00 (.06)                             | .00 (.01) | .00 (.00) |           |           | .00  | -.06/NA  |
| Between ages 75+            |                             |           |           |      |         | .00 (.00)                             | .00 (.00) |           |           |           | .00  | .00/0%   |
| <b>Women</b>                |                             |           |           |      |         |                                       |           |           |           |           |      |          |
| Between ages 18-24          | .35 (.35)                   | .45 (.36) | .55 (.39) | 0.54 | .04/11% |                                       |           | .17 (.24) | .24 (.28) | .34 (.37) | .60  | .13/54%  |
| Between ages 24-30          | .11 (.23)                   | .18 (.29) | .26 (.42) | .60  | .19/83% |                                       |           | .04 (.15) | .09 (.24) | .17 (.30) | .76  | .15/100% |
| Between ages 30-45          | .06 (.19)                   | .09 (.26) |           | .16  | .07/37% |                                       | .01 (.07) | .02 (.11) | .05 (.17) |           | .22  | .10/143% |
| Between ages 45-60          |                             |           |           |      |         | .00 (.02)                             | .01 (.07) | .01 (.09) |           |           | .15  | .07/350% |
| Between ages 60-75          |                             |           |           |      |         | .00 (.03)                             | .00 (.03) | .00 (.04) |           |           | -.01 | .01/33%  |
| Between ages 75+            |                             |           |           |      |         | .00 (.00)                             | .00 (.00) |           |           |           | .00  | .00/0%   |
| <b>Bachelor's degree</b>    |                             |           |           |      |         |                                       |           |           |           |           |      |          |
| Between ages 18-24          | .58 (.26)                   | .60 (.26) | .63 (.26) | .20  | .00/0%  |                                       |           | .14 (.28) | .20 (.27) | .36 (.37) | .73  | .09/32%  |
| Between ages 24-30          | .23 (.28)                   | .26 (.31) | .25 (.44) | .08  | .16/57% |                                       |           | .07 (.18) | .13 (.25) | .15 (.29) | .43  | .11/61%  |
| Between ages 30-45          | .09 (.20)                   | .09 (.26) |           | -.02 | .06/30% |                                       | .02 (.09) | .02 (.09) | .03 (.17) |           | .03  | .08/89%  |
| Between ages 45-60          |                             |           |           |      |         | .00 (.02)                             | .01 (.06) | .01 (.09) |           |           | .03  | .07/350% |
| Between ages 60-75          |                             |           |           |      |         | .00 (.01)                             | .00 (.05) | .00 (.02) |           |           | .00  | .01/100% |
| Between ages 75+            |                             |           |           |      |         | .00 (.00)                             | .00 (.00) |           |           |           | .00  | .00/0%   |
| <b>No Bachelor's degree</b> |                             |           |           |      |         |                                       |           |           |           |           |      |          |
| Between ages 18-24          | .24 (.36)                   | .32 (.41) | .44 (.44) | .52  | .08/22% |                                       |           | .18 (.23) | .25 (.28) | .32 (.37) | .51  | .14/61%  |
| Between ages 24-30          | .06 (.18)                   | .09 (.24) | .09 (.35) | .18  | .17/94% |                                       |           | .03 (.14) | .06 (.20) | .10 (.30) | .42  | .16/114% |
| Between ages 30-45          | .05 (.16)                   | .07 (.23) |           | .11  | .07/44% |                                       | .01 (.06) | .01 (.09) | .02 (.15) |           | .12  | .09/150^ |
| Between ages 45-60          |                             |           |           |      |         | .00 (.02)                             | .01 (.06) | .00 (.07) |           |           | -.04 | .05/250% |
| Between ages 60-75          |                             |           |           |      |         | .00 (.03)                             | .00 (.02) | .00 (.03) |           |           | .00  | .00/0%   |
| Between ages 75+            |                             |           |           |      |         | .00 (.01)                             | .00 (.00) |           |           |           | .00  | .00/0%   |

Notes. SDs are in parentheses. Net D, Net Δ SD, and Net %Δ in SD compare youngest available cohort to oldest available cohort.

**Table S4**

*Mean and SDs of Social Role Instability in Residential Independence by Data Source, Birth-year Group, Age Group, and Sociodemographic Moderator*

|                             | Monitoring the Future (MTF) |           |           |      |         | Panel Study of Income Dynamics (PSID) |           |           |           |           |      |           |
|-----------------------------|-----------------------------|-----------|-----------|------|---------|---------------------------------------|-----------|-----------|-----------|-----------|------|-----------|
|                             | 1950-69                     | 1970-89   | ≥1990     | Net  | NET SD  | ≤1929                                 | 1930-49   | 1950-69   | 1970-89   | ≥1990     | Net  | NET SD    |
|                             |                             |           |           | D    | Δ/%Δ    |                                       |           |           |           |           | D    | Δ/%Δ      |
| <b>Full Sample</b>          |                             |           |           |      |         |                                       |           |           |           |           |      |           |
| Between ages 18-24          | .37 (.31)                   | .38 (.34) | .37 (.39) | .01  | .08/26% |                                       |           | .09 (.14) | .11 (.19) | .12 (.25) | .18  | .11/79%   |
| Between ages 24-30          | .17 (.27)                   | .18 (.29) | .24 (.41) | .25  | .14/42% |                                       |           | .03 (.09) | .06 (.16) | .07 (.25) | .43  | .16/178%  |
| Between ages 30-45          | .09 (.18)                   | .09 (.24) |           | .00  | .06/33% |                                       | .00 (.04) | .01 (.06) | .02 (.08) |           | .13  | .04/100%  |
| Between ages 45-60          |                             |           |           |      |         | .00 (.03)                             | .00 (.04) | .01 (.06) |           |           | .10  | .03/100%  |
| Between ages 60-75          |                             |           |           |      |         | .00 (.05)                             | .01 (.06) | .01 (.04) |           |           | .16  | -.01/-20% |
| Between ages 75+            |                             |           |           |      |         | .01 (.08)                             | .01 (.04) |           |           |           | -.06 | -.04/-50% |
| <b>Men</b>                  |                             |           |           |      |         |                                       |           |           |           |           |      |           |
| Between ages 18-24          | .36 (.32)                   | .37 (.35) | .37 (.40) | .05  | .08/25% |                                       |           | .09 (.15) | .11 (.19) | .12 (.24) | .18  | .09/60%   |
| Between ages 24-30          | .18 (.28)                   | .18 (.29) | .22 (.41) | .16  | .13/46% |                                       |           | .03 (.10) | .07 (.17) | .12 (.23) | .75  | .13/130%  |
| Between ages 30-45          | .08 (.21)                   | .10 (.26) |           | .09  | .05/24% |                                       | .00 (.02) | .01 (.06) | .01 (.08) |           | .16  | .06/300%  |
| Between ages 45-60          |                             |           |           |      |         | .00 (.02)                             | .00 (.04) | .01 (.07) |           |           | .08  | .05/250%  |
| Between ages 60-75          |                             |           |           |      |         | .00 (.05)                             | .01 (.06) | .00 (.05) |           |           | .00  | .00/0%    |
| Between ages 75+            |                             |           |           |      |         | .00 (.07)                             | .00 (.04) |           |           |           | -.02 | -.03/43%  |
| <b>Women</b>                |                             |           |           |      |         |                                       |           |           |           |           |      |           |
| Between ages 18-24          | .35 (.30)                   | .37 (.33) | .39 (.39) | .11  | .09/30% |                                       |           | .10 (.12) | .12 (.19) | .13 (.26) | .25  | .14/117%  |
| Between ages 24-30          | .15 (.26)                   | .17 (.28) | .25 (.41) | .34  | .15/58% |                                       |           | .02 (.08) | .06 (.15) | .09 (.26) | .69  | .18/225%  |
| Between ages 30-45          | .08 (.20)                   | .10 (.25) |           | .10  | .05/25% |                                       | .00 (.04) | .01 (.05) | .01 (.08) |           | .12  | .04/100%  |
| Between ages 45-60          |                             |           |           |      |         | .00 (.04)                             | .00 (.04) | .00 (.05) |           |           | .00  | .01/25%   |
| Between ages 60-75          |                             |           |           |      |         | .00 (.05)                             | .01 (.07) | .01 (.04) |           |           | .03  | -.01/-20% |
| Between ages 75+            |                             |           |           |      |         | .01 (.07)                             | .01 (.04) |           |           |           | .11  | -.03/-43% |
| <b>Bachelor's degree</b>    |                             |           |           |      |         |                                       |           |           |           |           |      |           |
| Between ages 18-24          | .43 (.28)                   | .43 (.29) | .45 (.31) | .08  | .03/11% |                                       |           | .09 (.14) | .11 (.19) | .10 (.22) | .06  | .08/57%   |
| Between ages 24-30          | .18 (.26)                   | .18 (.28) | .23 (.40) | .21  | .14/54% |                                       |           | .03 (.08) | .08 (.15) | .11 (.33) | .59  | .25/313%  |
| Between ages 30-45          | .08 (.18)                   | .08 (.24) |           | .00  | .06/33% |                                       | .00 (.01) | .00 (.03) | .01 (.06) |           | .08  | .05/500%  |
| Between ages 45-60          |                             |           |           |      |         | .00 (.06)                             | .01 (.04) | .01 (.04) |           |           | .13  | -.02/-33% |
| Between ages 60-75          |                             |           |           |      |         | .00 (.02)                             | .00 (.06) | .00 (.03) |           |           | .11  | .01/50%   |
| Between ages 75+            |                             |           |           |      |         | .01 (.04)                             | .00 (.01) |           |           |           | -.15 | -.03/-75% |
| <b>No Bachelor's degree</b> |                             |           |           |      |         |                                       |           |           |           |           |      |           |
| Between ages 18-24          | .34 (.32)                   | .35 (.37) | .33 (.43) | -.04 | .11/34% |                                       |           | .09 (.14) | .11 (.19) | .13 (.25) | .20  | .11/79%   |
| Between ages 24-30          | .17 (.28)                   | .19 (.30) | .25 (.42) | .26  | .14/50% |                                       |           | .02 (.09) | .06 (.16) | .04 (.21) | .17  | .12/133%  |
| Between ages 30-45          | .11 (.22)                   | .11 (.28) |           | .02  | .06/27% |                                       | .00 (.04) | .01 (.06) | .02 (.09) |           | .21  | .05/125%  |
| Between ages 45-60          |                             |           |           |      |         | .00 (.03)                             | .00 (.04) | .01 (.07) |           |           | .14  | .04/133%  |
| Between ages 60-75          |                             |           |           |      |         | .01 (.05)                             | .01 (.07) | .02 (.05) |           |           | .14  | .00/0%    |
| Between ages 75+            |                             |           |           |      |         | .01 (.06)                             | .01 (.05) |           |           |           | .07  | -.01/-17% |

*Notes.* SDs are in parentheses. Net D, Net Δ SD, and Net %Δ in SD compare youngest available cohort to oldest available cohort.
